# Supplementary material
Source: PubMed Central journal article supplement (PMC3471457)
Supplement: mmc1.pdf [file mmc1.pdf]

# Modulation of folding kinetics of repeat proteins: Interplay between intra- and interdomain interactions

## Supporting Information

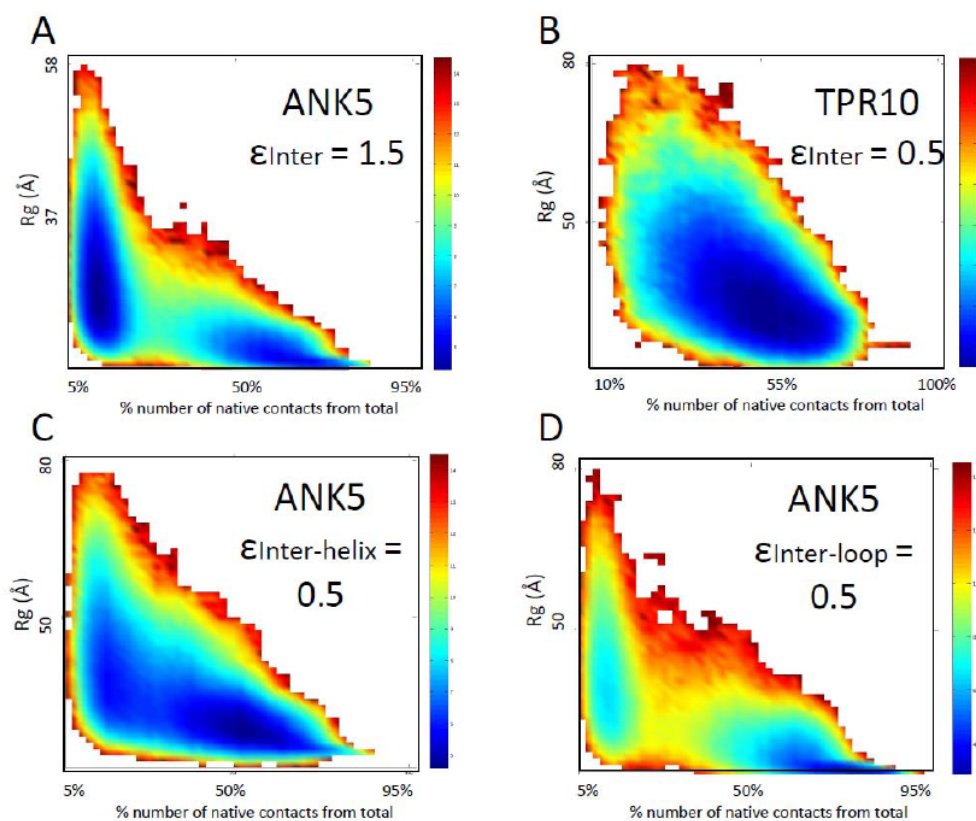

**Figure S1.**

The free energy landscapes of various ANK and TPR systems projected along  $R_g$  and  $Q$ . The free energy of the system in a given  $R_g$  (radius of gyration) and a given number of contacts ( $Q$ ). Dark blue regions indicate relatively populated conformations. (A) ANK5 system with inter-contacts with increased strength. (B) TPR10 system with reduced inter-contact strength. (C) ANK5 system with reduced inter-contacts between helices (D) ANK5 system with reduced inter-contacts between loops.

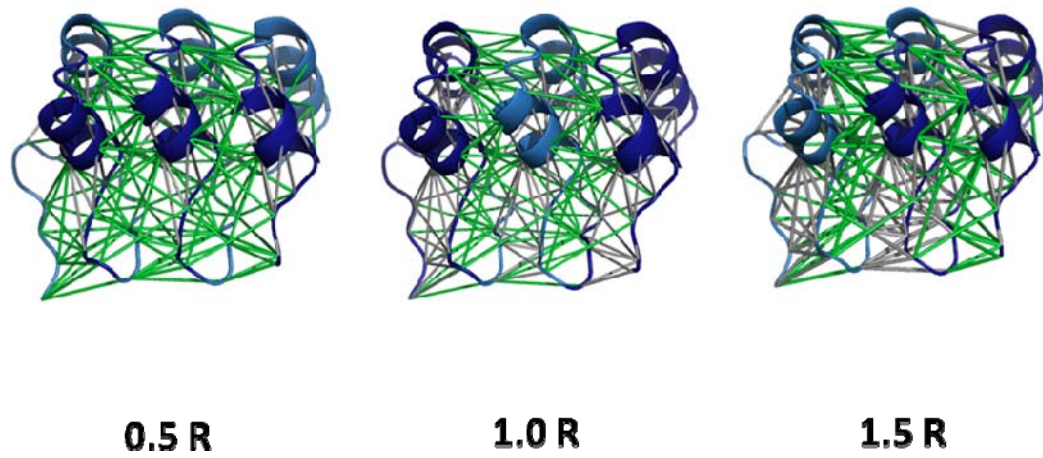

**Figure S2.**

**Definition of repeat boundaries in ANK proteins.**

The interface contacts (in green) and the intra-contacts (in grey) in ANK3 where the repeating unit definition was altered. The boundaries are defined by half a repeat (a single helix) (left), a repeat unit (34 residues) (middle), and repeat and a half (right)
